# Supplementary material for: Sky-blue thermally activated delayed fluorescence (TADF) based on Ag(i) complexes: strong solvation-induced emission enhancement
Source: Royal Society of Chemistry journal article supplement (doi:10.1039/c9qi01069f), 2019-01-01
Supplement: c9qi01069f1.pdf [file c9qi01069f1.pdf]

## Supplementary materials

### Sky-blue thermally activated delayed fluorescence (TADF) based on Ag(I) complexes: strong solvation-induced emission enhancement

Alexander V. Artem'ev,<sup>\*a,b</sup> Marsel Z. Shafikov,<sup>c,d</sup> Alexander Schinabeck,<sup>c</sup> Olga V. Antonova,<sup>a</sup> Alexey S. Berezin,<sup>a,b</sup> Irina Yu. Bagryanskaya,<sup>b,e</sup> Pavel E. Plusnin,<sup>a,b</sup> and Hartmut Yersin<sup>\*c</sup>

<sup>a</sup> Nikolaev Institute of Inorganic Chemistry, Siberian Branch of Russian Academy of Sciences, 3, Acad. Lavrentiev Ave., Novosibirsk 630090, Russian Federation

<sup>b</sup> Novosibirsk State University, 2, Pirogova Str., Novosibirsk 630090, Russian Federation

<sup>c</sup> Universität Regensburg, Institut für Physikalische Chemie, Universitätsstr. 31, 93053 Regensburg, Germany

<sup>d</sup> Ural Federal University, Mira 19, Ekaterinburg 620002, Russian Federation

<sup>e</sup> N. N. Vorozhtsov Novosibirsk Institute of Organic Chemistry, Siberian Branch of Russian Academy of Sciences, 9, Acad. Lavrentiev Ave., Novosibirsk 630090, Russian Federation

\*Corresponding authors: [chemisufarm@yandex.ru](mailto:chemisufarm@yandex.ru) (Alexander V. Artem'ev), [hartmut.yersin@ur.de](mailto:hartmut.yersin@ur.de) (Hartmut Yersin)

#### Table of Contents

##### Pages

|         |                            |
|---------|----------------------------|
| S2–4    | §1. X-Ray crystallography  |
| S5      | §2. Thermogravimetric data |
| S5–S7   | §3. FT-IR spectra          |
| S7–S9   | §4. NMR spectra            |
| S10     | §5. Photophysical data     |
| S11–S16 | §6. Computational details  |

## §1. X-Ray crystallography

The X-ray data and the details of the refinement for **1**·CHCl<sub>3</sub> and **2** are summarized in Table S1. The data were collected on a Bruker Kappa Apex II CCD diffractometer using  $\phi, \omega$ -scans of narrow (0.5°) frames with MoK $\alpha$  radiation ( $\lambda = 0.71073 \text{ \AA}$ ) and a graphite monochromator. The structures were solved by direct method and refined by a full matrix least-squares anisotropic-isotropic (for H atoms) procedure using *SHELXL-2014/7* program set.<sup>[1]</sup> Absorption corrections were applied using the empirical multiscan method with the *SADABS* program.<sup>[2]</sup> The positions of the hydrogen atoms were calculated with the riding model.

**Table S1.** Crystal data and structure refinement for **1**·CHCl<sub>3</sub> and **2**.

|                                                                            | <b>1</b> ·CHCl <sub>3</sub>                                                                                   | <b>2</b>                                                           |
|----------------------------------------------------------------------------|---------------------------------------------------------------------------------------------------------------|--------------------------------------------------------------------|
| CCDC                                                                       | 1529534                                                                                                       | 1529535                                                            |
| Chemical formula                                                           | C <sub>48</sub> H <sub>37</sub> Ag <sub>2</sub> N <sub>11</sub> P <sub>3</sub> S <sub>2</sub> Cl <sub>3</sub> | C <sub>46</sub> H <sub>36</sub> AgN <sub>10</sub> P <sub>3</sub> S |
| $M_r$                                                                      | 1247.01                                                                                                       | 961.69                                                             |
| Crystal system, space group                                                | Monoclinic, $P2_1/n$                                                                                          | Orthorhombic, $P2_12_12_1$                                         |
| Temperature (K)                                                            | 296                                                                                                           | 200                                                                |
| $a, b, c$ (Å)                                                              | 13.3901(4), 16.8437(4), 22.8930(7)                                                                            | 10.8909(2), 15.2773(4), 26.0826(6)                                 |
| $\alpha, \beta, \gamma$ (°)                                                | 90, 90.552(1), 90                                                                                             | 90, 90, 90                                                         |
| $V$ (Å <sup>3</sup> )                                                      | 5163.0(3)                                                                                                     | 4339.72(17)                                                        |
| $\mu$ (mm <sup>-1</sup> )                                                  | 1.13                                                                                                          | 0.67                                                               |
| Crystal size (mm)                                                          | 0.60 × 0.30 × 0.10                                                                                            | 0.50 × 0.30 × 0.10                                                 |
| $T_{\min}, T_{\max}$                                                       | 0.634, 0.746                                                                                                  | 0.684, 0.746                                                       |
| No. of measured, independent and observed [ $I > 2\sigma(I)$ ] reflections | 67667, 11862, 8461                                                                                            | 55914, 11712, 10296                                                |
| $R_{\text{int}}$                                                           | 0.055                                                                                                         | 0.045                                                              |
| $(\sin \theta/\lambda)_{\text{max}}$ (Å <sup>-1</sup> )                    | 0.650                                                                                                         | 0.704                                                              |
| $R[F^2 > 2\sigma(F^2)], wR(F^2), S$                                        | 0.047, 0.140, 1.04                                                                                            | 0.031, 0.069, 1.01                                                 |
| No. of reflections                                                         | 11862                                                                                                         | 11712                                                              |
| No. of parameters                                                          | 687                                                                                                           | 550                                                                |
| $\Delta\rho_{\text{max}}, \Delta\rho_{\text{min}}$ (e Å <sup>-3</sup> )    | 1.13, -0.89                                                                                                   | 0.64, -0.58                                                        |

<sup>[1]</sup> G. M. Sheldrick, *Acta Crystallogr., Sect. C: Struct. Chem.*, **2015**, *71*, 3–8.

<sup>[2]</sup> *SADABS*, v. 2008-1, Bruker AXS, Madison, WI, USA, 2008.

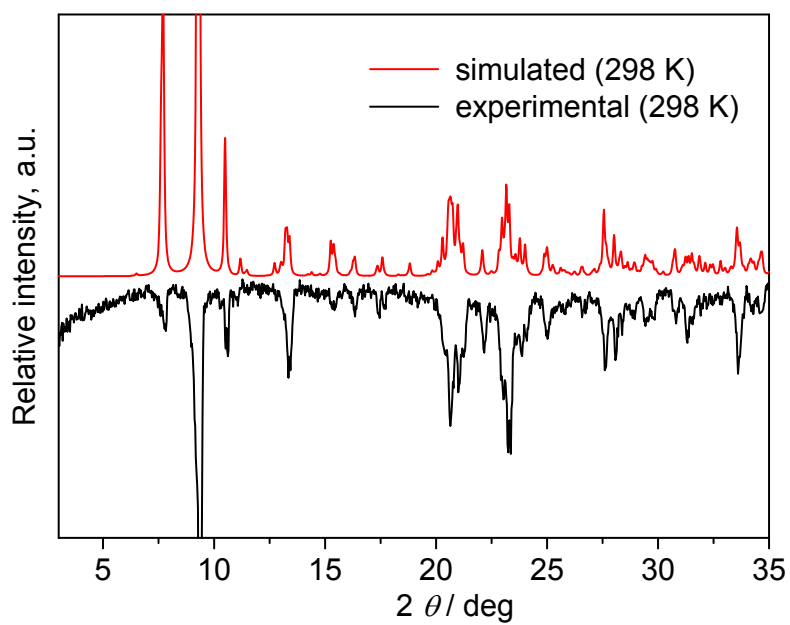

**Figure S1.** Experimental and simulated X-ray powder patterns for **1**·CHCl<sub>3</sub>.

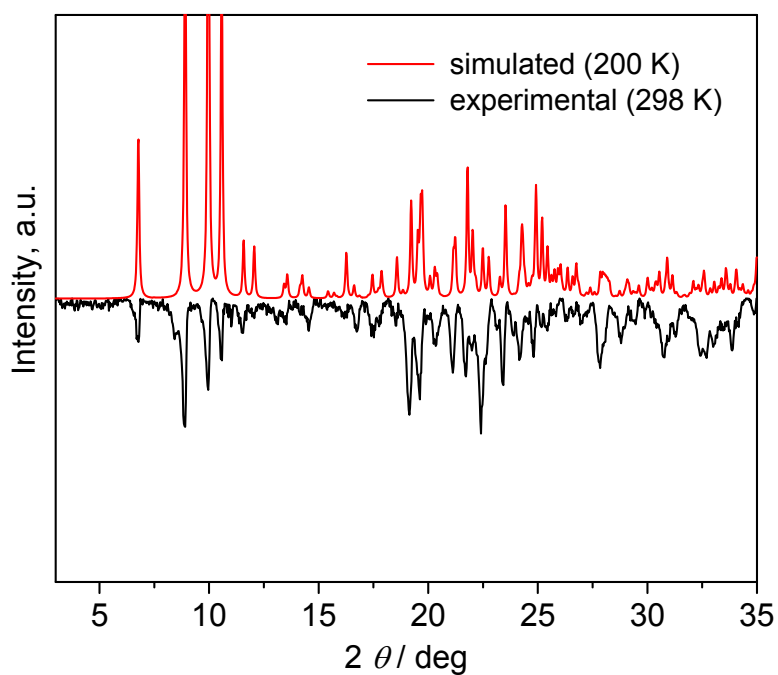

**Figure S2.** Experimental and simulated X-ray powder patterns for **2**.

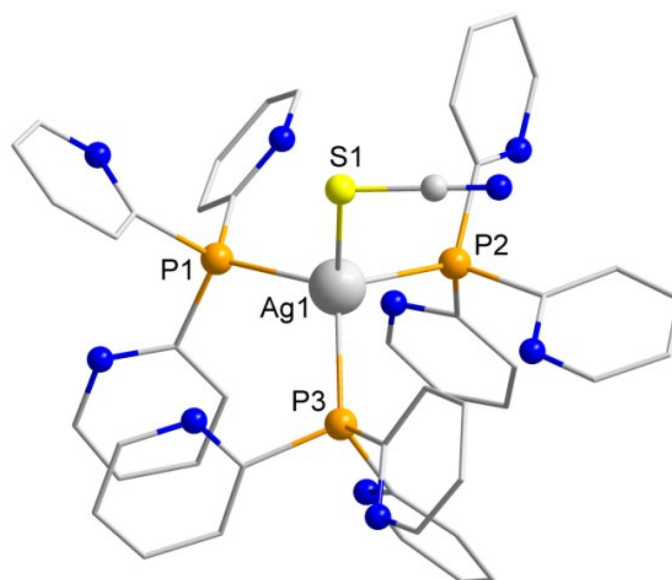

**Figure S3.** Molecular structure of **2** determined by X-ray diffraction analysis. Selected distances (Å): Ag1–P1 2.4950(5), Ag1–P2 2.5076(5), Ag1–P3 2.5185(5), Ag1–S1 2.6160(5).

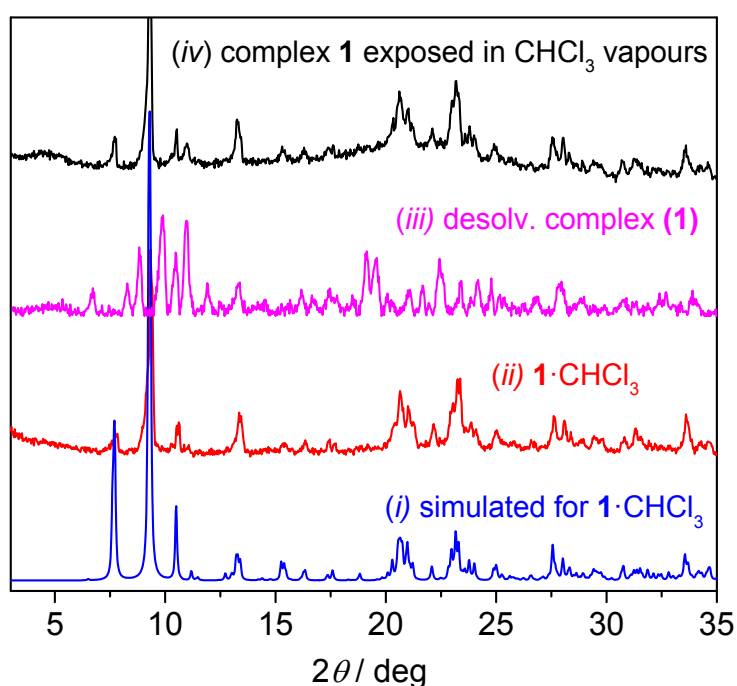

**Figure S4.** XRPD monitoring of the reversible  $1 \cdot \text{CHCl}_3 \leftrightarrow 1$  process: (i) simulated XRDP pattern for  $1 \cdot \text{CHCl}_3$ ; (ii) experimental XRDP pattern for  $1 \cdot \text{CHCl}_3$ ; (iii) XRDP pattern for the parent complex **1**, obtained by heating of  $1 \cdot \text{CHCl}_3$ ; (iv) XRDP pattern for the  $1 \cdot \text{CHCl}_3$ , obtained after exposing of the parent complex **1** in  $\text{CHCl}_3$  vapours (room temperature, a closed vial contacting  $\sim 0.2\text{--}0.3$  mL chloroform).

## §2. Thermogravimetric data

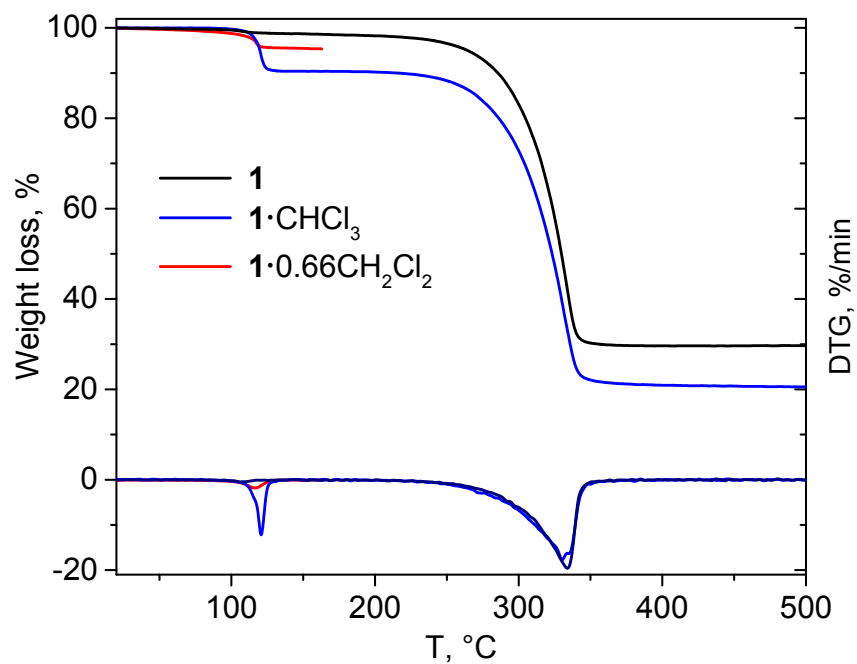

**Figure S5.** TGA&DTG curves for **1** as well as **1·CHCl<sub>3</sub>** and **1·0.66CH<sub>2</sub>Cl<sub>2</sub>** in the temperature range of 25–500 °C.

## §3. FT-IR spectra

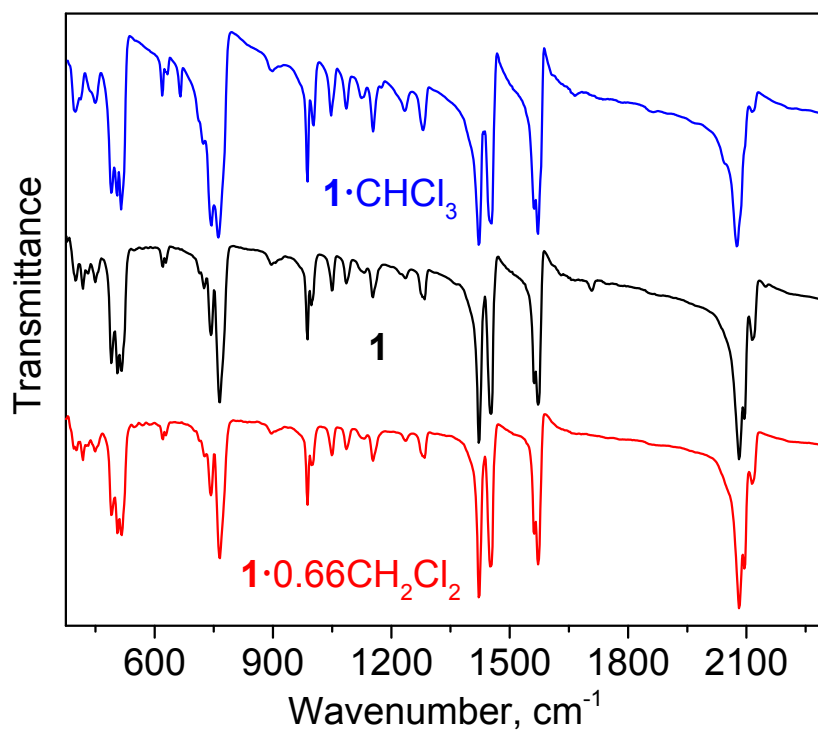

**Figure S6.** FT-IR spectra of **1** as well as **1·CHCl<sub>3</sub>** and **1·0.66CH<sub>2</sub>Cl<sub>2</sub>**, in the range of 400–2300 cm<sup>-1</sup>.

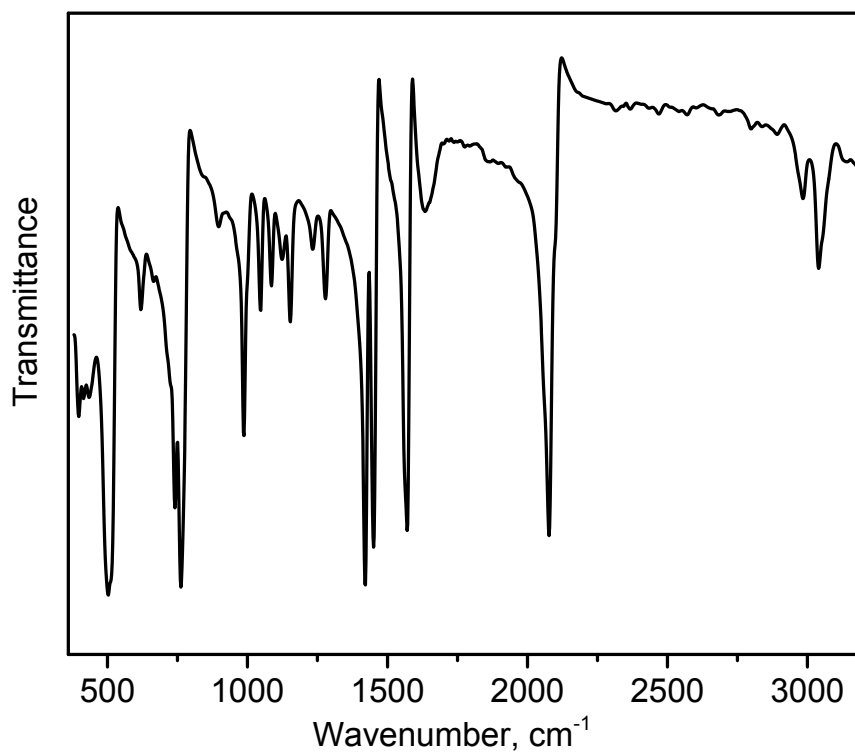

**Figure S7.** FT-IR spectrum of **1**.

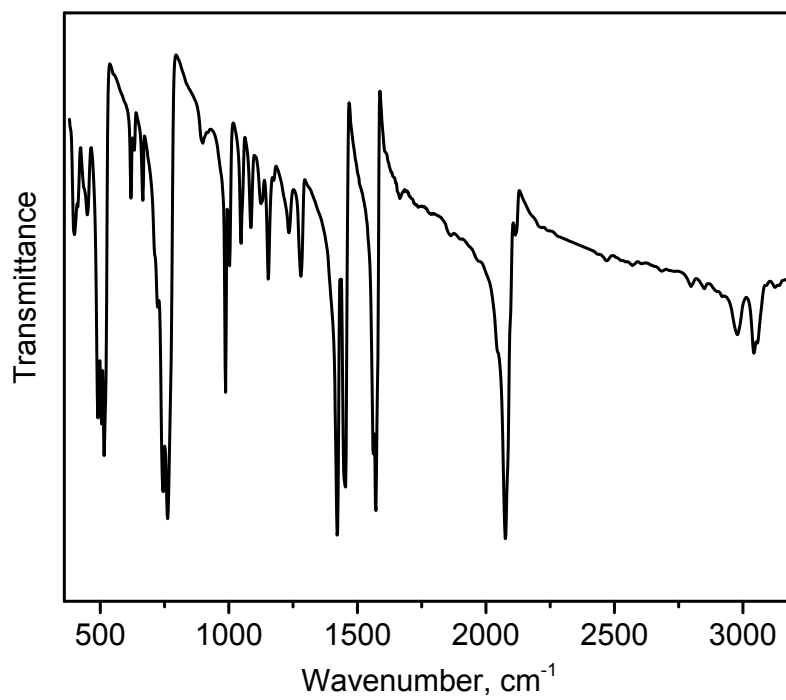

**Figure S8.** FT-IR spectrum of **1·CHCl<sub>3</sub>**.

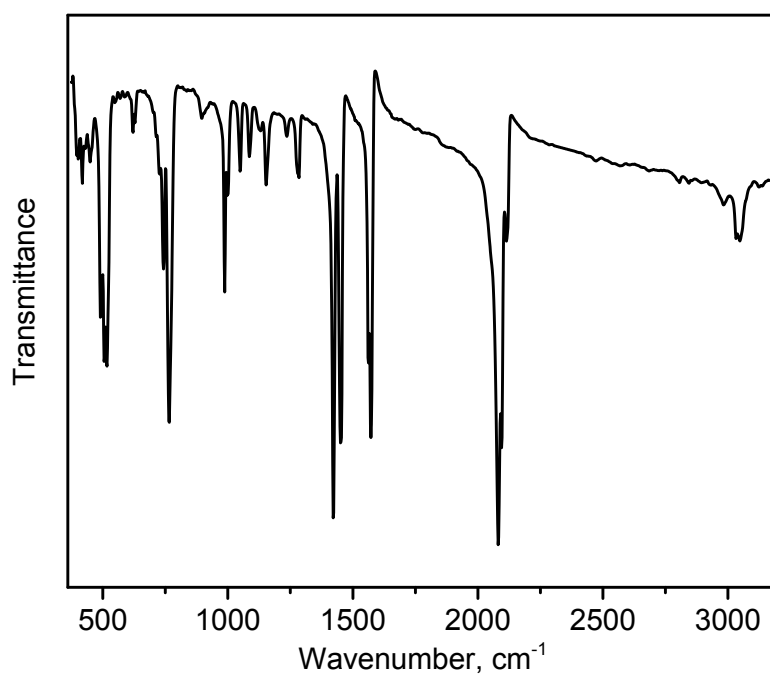

Figure S9. FT-IR spectrum of **1**·0.66CH<sub>2</sub>Cl<sub>2</sub>.

#### §4. NMR spectra

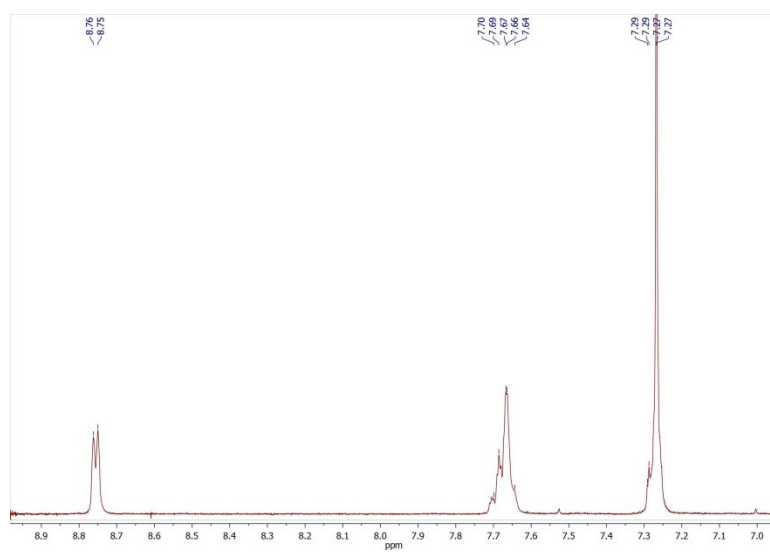

Figure S10. <sup>1</sup>H NMR spectrum of **1** (CDCl<sub>3</sub>).

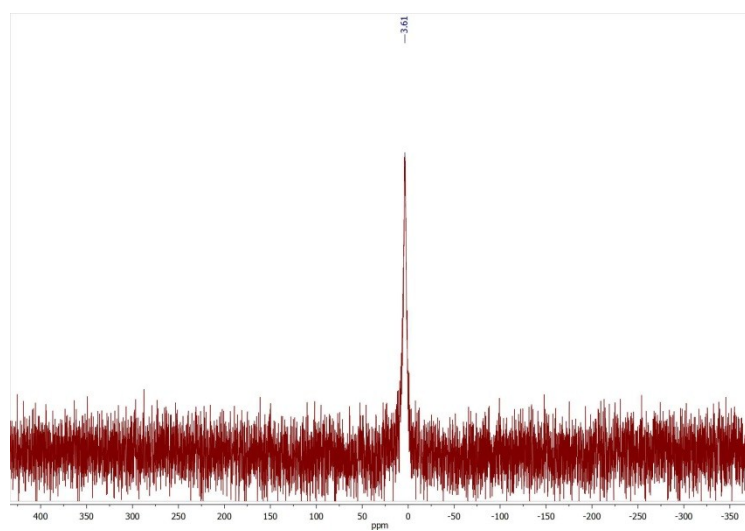

**Figure S11.**  $^{31}\text{P}\{^1\text{H}\}$  NMR spectrum of **1** ( $\text{CDCl}_3$ ).

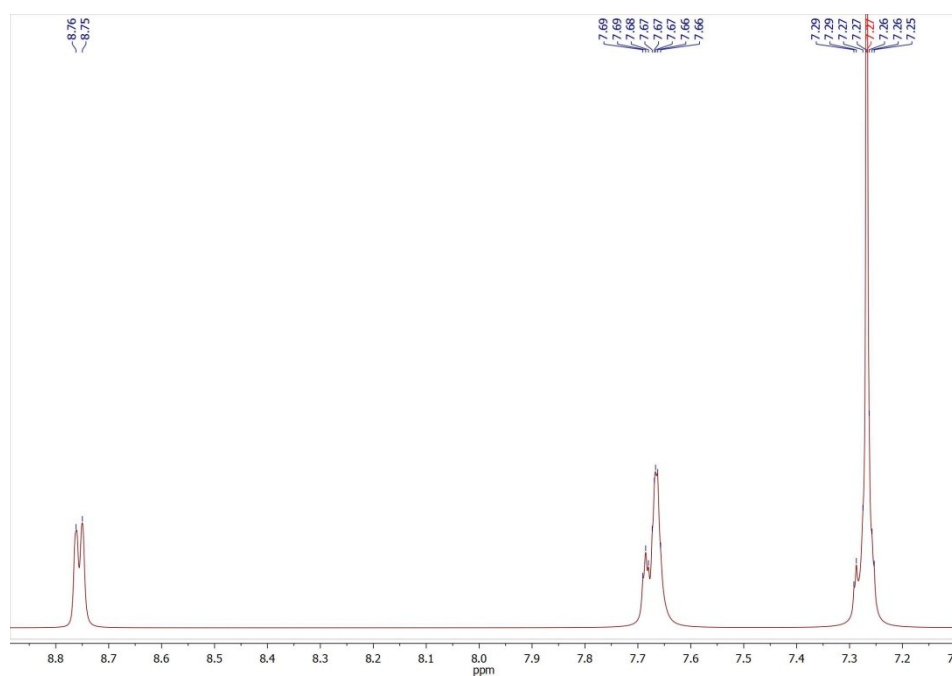

**Figure S12.**  $^1\text{H}$  NMR spectrum of **1**· $\text{CHCl}_3$  ( $\text{CDCl}_3$ ).



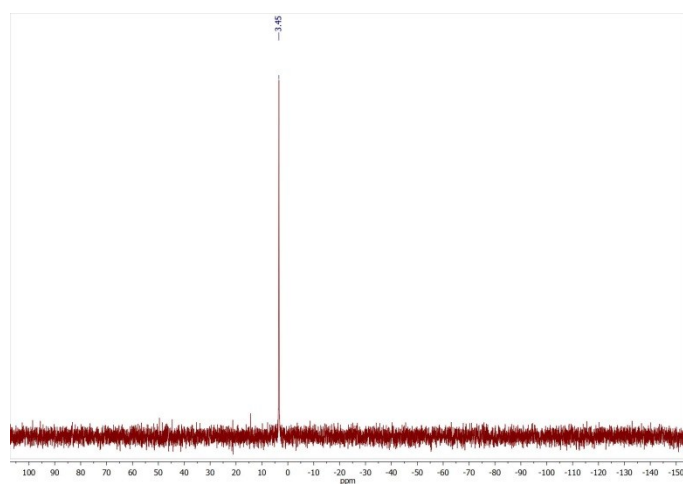

**Figure S13.**  $^{31}\text{P}\{^1\text{H}\}$  NMR spectrum of  $1\cdot\text{CHCl}_3$  ( $\text{CDCl}_3$ ).

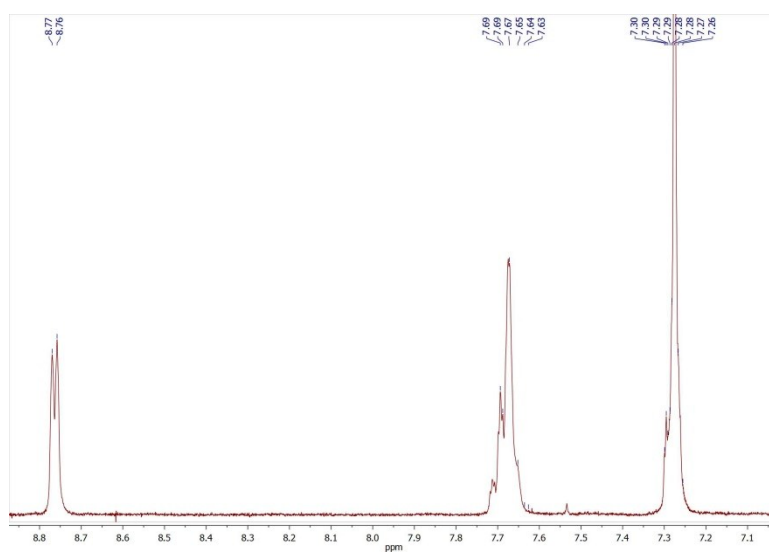

**Figure S14.**  $^1\text{H}$  NMR spectrum of  $1\cdot 0.66\text{CH}_2\text{Cl}_2$  ( $\text{CDCl}_3$ ).

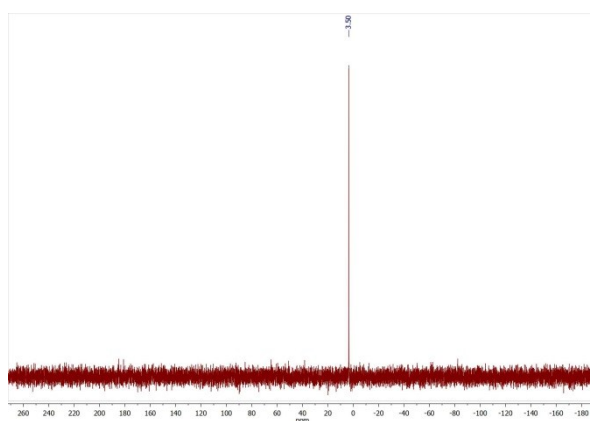

**Figure S15.**  $^{31}\text{P}\{^1\text{H}\}$  NMR spectrum of  $1\cdot 0.66\text{CH}_2\text{Cl}_2$  ( $\text{CDCl}_3$ ).

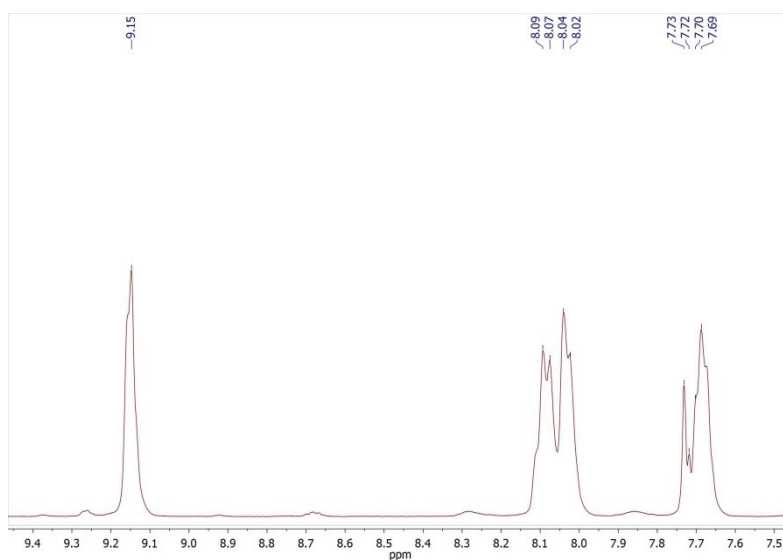

**Figure S16.**  $^1\text{H}$  NMR spectrum of **2** ( $\text{CD}_3\text{CN}$ ).

## §5. Photophysical data

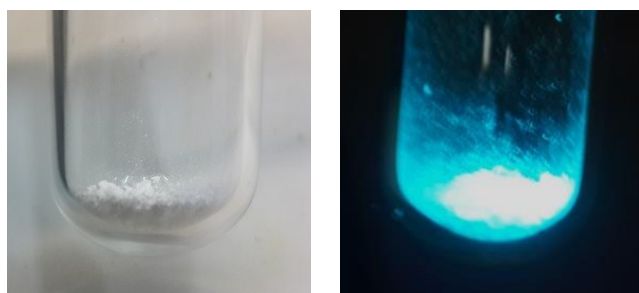

**Figure S17.** Photographs of the powder **1**· $\text{CH}_2\text{Cl}_2$  under ambient light (*left*) and UV-light (*right*).

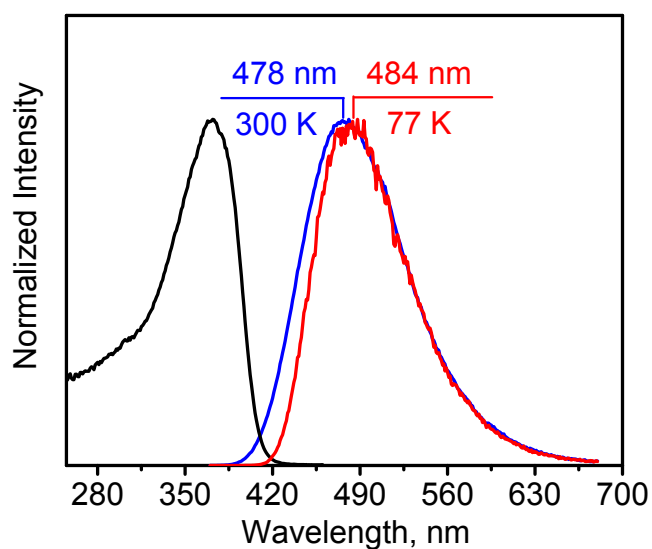

**Figure S18.** Emission spectra of the powder **1**· $\text{CHCl}_3$  recorded at 300 and 77 K ( $\lambda_{\text{ex}} = 350$  nm), and excitation spectrum recorded at 300 K ( $\lambda_{\text{det}} = 380$  nm).

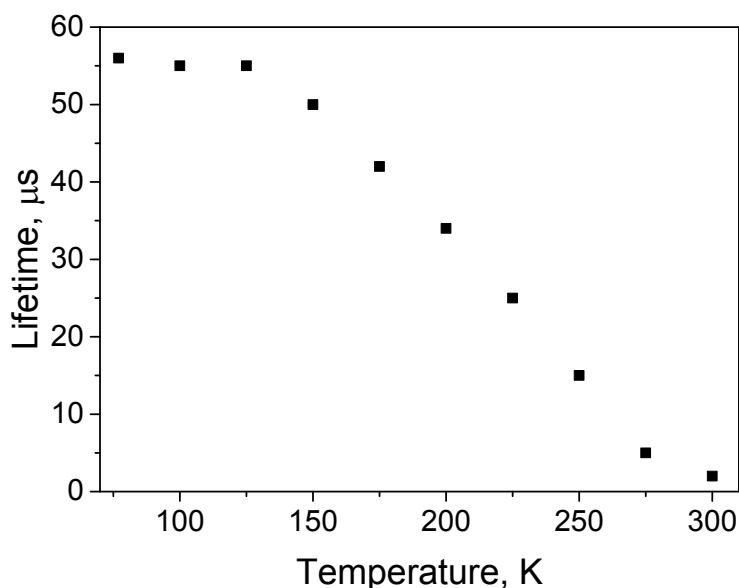

**Figure S19.** Temperature dependence of the emission lifetimes for the **1** ( $\lambda_{\text{ex}} = 350$  nm and  $\lambda_{\text{det}} = 470$  nm).

## §6. Computational details

The DFT (density functional theory) computations of **1** have been performed using Gaussian 09 D01 program.<sup>[3]</sup> Calculations have been carried out utilizing the def2-SVP<sup>[4],[5]</sup> basis set combined with the M064<sup>[6]</sup> functional for geometry optimizations and with the M062X<sup>[6]</sup> functional for calculations of time-dependent wavefunctions (TD-DFT), all under gas phase conditions. The geometry of the **1** was optimized for the ground state ( $S_0$ ) and the lowest triplet state ( $T_1$ ) electronic configurations.

**Table S2.** Excited state properties of **1** obtained from TD-DFT calculations (M062X/def2-SVP) carried out for the geometry of the lowest excited triplet state ( $T_1$ ).

| E, eV | $f$       | Transition (coefficient)                                                                                    | Character                                                  |
|-------|-----------|-------------------------------------------------------------------------------------------------------------|------------------------------------------------------------|
| 2.90  | (triplet) | HOMO→LUMO (0.65)                                                                                            | $(M_{\text{Ag}1}+L_{\text{thcy}1})L_{\text{py}1}\text{CT}$ |
| 3.46  | (triplet) | HOMO-1→LUMO (0.53)<br>HOMO-4→LUMO (0.24)<br>HOMO→LUMO+1 (-0.19)<br>HOMO-2→LUMO (0.12)<br>HOMO-5→LUMO (0.12) | $L_{\text{thcy}1}L_{\text{py}1}\text{CT}$                  |

<sup>[3]</sup> M. J. Frisch et al. *Gaussian 09*, Gaussian, Inc.: Wallingford, CT, USA, 2009.

<sup>[4]</sup> F. Weigend, *Phys. Chem. Chem. Phys.* 2006, **8**, 1057–1065.

<sup>[5]</sup> F. Weigend and R. Ahlrichs, *Phys. Chem. Chem. Phys.*, 2005, **7**, 3297–3305.

<sup>[6]</sup> Y. Zhao and D. G. Truhlar, *Theor. Chem. Acc.*, 2008, **120**, 215–241.

|                                                                                                                                                                                      |           |                                                                                                                                       |                                |
|--------------------------------------------------------------------------------------------------------------------------------------------------------------------------------------|-----------|---------------------------------------------------------------------------------------------------------------------------------------|--------------------------------|
| 3.49                                                                                                                                                                                 | (triplet) | HOMO→LUMO+1 (0.50)<br>HOMO→LUMO+4 (0.20)<br>HOMO→LUMO+3 (-0.16)<br>HOMO-1→LUMO (0.15)<br>HOMO-5→LUMO+1 (0.13)<br>HOMO-4→LUMO+1 (0.12) | $(M_{Ag1}+L_{thcy})L_{py}CT$   |
| 3.53                                                                                                                                                                                 | (triplet) | HOMO→LUMO+3 (0.48)<br>HOMO→LUMO+1 (0.24)<br>HOMO→LUMO+4 (-0.22)<br>HOMO→LUMO+2 (0.19)<br>HOMO→LUMO+5 (0.18)                           | $(M_{Ag1}+L_{thcy1})L_{py}CT$  |
| 3.56                                                                                                                                                                                 | (triplet) | HOMO-1→LUMO (0.41)<br>HOMO-4→LUMO (-0.34)<br>HOMO-2→LUMO (-0.18)<br>HOMO-5→LUMO (-0.16)<br>HOMO-7→LUMO (0.15)                         | $(M_{Ag2}+L_{thcy1})L_{py1}CT$ |
| 3.02                                                                                                                                                                                 | 0.0165    | HOMO→LUMO (0.67)                                                                                                                      | $(M_{Ag1}+L_{thcy1})L_{py1}CT$ |
| 3.51                                                                                                                                                                                 | 0.0004    | HOMO-1→LUMO (0.68)                                                                                                                    | $L_{thcy1}L_{py1}CT$           |
| 3.63                                                                                                                                                                                 | 0.0396    | HOMO→LUMO+3 (0.48)<br>HOMO→LUMO+1 (-0.30)<br>HOMO→LUMO+4 (-0.29)<br>HOMO→LUMO+5 (0.20)                                                | $(M_{Ag1}+L_{thcy1})L_{py}CT$  |
| 3.71                                                                                                                                                                                 | 0.0238    | HOMO→LUMO+1 (0.59)<br>HOMO→LUMO+3 (0.30)<br>HOMO→LUMO+2 (0.10)                                                                        | $(M_{Ag1}+L_{thcy1})L_{py}CT$  |
| 3.79                                                                                                                                                                                 | 0.0124    | HOMO→LUMO+2 (0.66)                                                                                                                    | $(M_{Ag1}+L_{thcy1})L_{py}CT$  |
| a) thcy1 – thiocyanate anion coordinated to Ag1<br>b) py1 – pyridine ring coordinated to Ag1<br>c) py2 – pyridine ring coordinated to Ag2<br>d) py – not coordinated pyridine rings. |           |                                                                                                                                       |                                |

**Table S3.** Orbital energies and compositions of **1** resulting from Mulliken population analysis in the relaxed geometry of the lowest excited triplet state ( $T_1$ ) calculated at M062X/def2-SVP level of the theory.

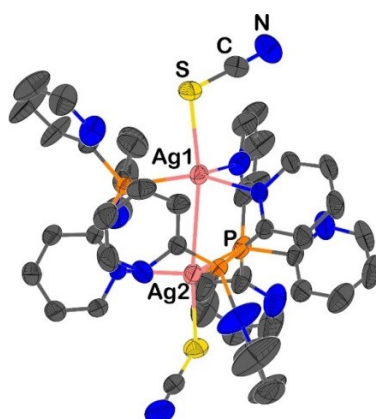

| Orbital | Energy, (eV) | Contributions, (%) |                    |                  |                   |     |                    |                  |                 |    |
|---------|--------------|--------------------|--------------------|------------------|-------------------|-----|--------------------|------------------|-----------------|----|
|         |              | Ag1                | thcy1 <sup>a</sup> | py1 <sup>c</sup> | py1' <sup>d</sup> | Ag2 | thcy2 <sup>b</sup> | py2 <sup>e</sup> | py <sup>f</sup> | P  |
| LUMO+4  | -0.45        | 0                  | 0                  | 2                | 17                | 2   | 0                  | 1                | 71              | 7  |
| LUMO+3  | -0.50        | 8                  | 0                  | 0                | 7                 | -1  | 0                  | 6                | 74              | 7  |
| LUMO+2  | 0.54         | 0                  | 0                  | 59               | 4                 | 0   | 0                  | 0                | 30              | 5  |
| LUMO+1  | -0.59        | 1                  | 0                  | 2                | 0                 | 0   | 0                  | 9                | 80              | 7  |
| LUMO    | -1.14        | 4                  | 0                  | 1                | 71                | -1  | 0                  | 1                | 16              | 7  |
| HOMO    | -5.96        | 12                 | 53                 | 1                | 4                 | 5   | 8                  | 2                | 4               | 12 |
| HOMO-1  | -6.25        | 4                  | 93                 | 0                | 0                 | 0   | 0                  | 0                | 1               | 0  |
| HOMO-2  | -6.55        | 0                  | 0                  | 0                | 0                 | 4   | 90                 | 1                | 3               | 1  |
| HOMO-3  | -6.57        | 3                  | 18                 | 1                | 0                 | 1   | 62                 | 1                | 2               | 5  |
| HOMO-4  | -7.44        | 2                  | 1                  | 3                | 7                 | 17  | 4                  | 2                | 26              | 38 |

e) thcy1 – thiocyanate anion coordinated to Ag1

f) thcy2 – thiocyanate anion coordinated to Ag2

g) py1 – pyridine ring coordinated to Ag1

h) py1' – second pyridine ring coordinated to Ag1

i) py2 – pyridine ring coordinated to Ag2

j) py – not coordinated pyridine rings.

**Figure S20.** Iso-surface contour plots (iso-value = 0.05) of the selected orbital of **1** in the lowest triplet state ( $T_1$ ) geometry calculated at M062X/def2-SVP level of the theory.

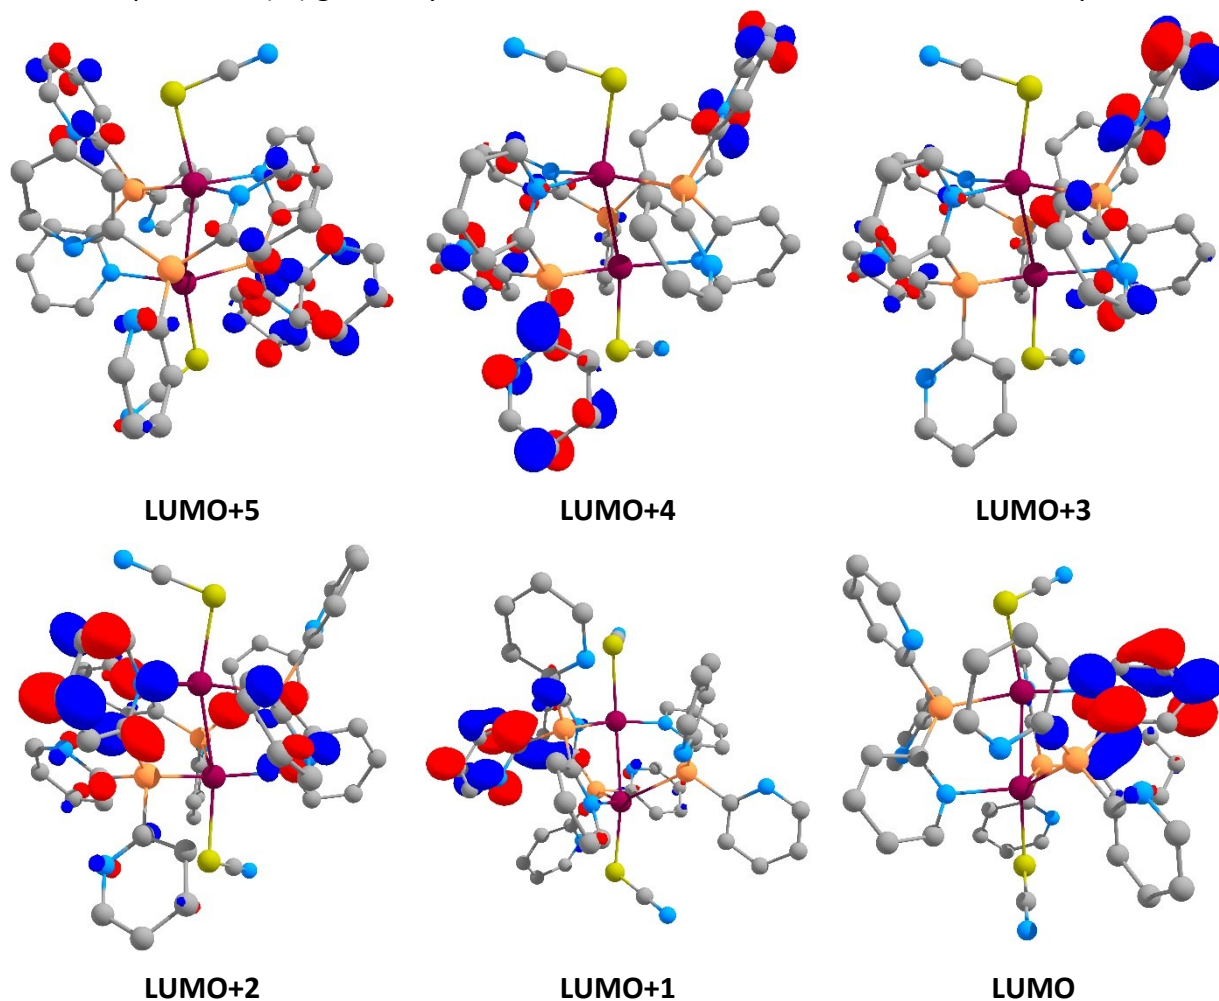

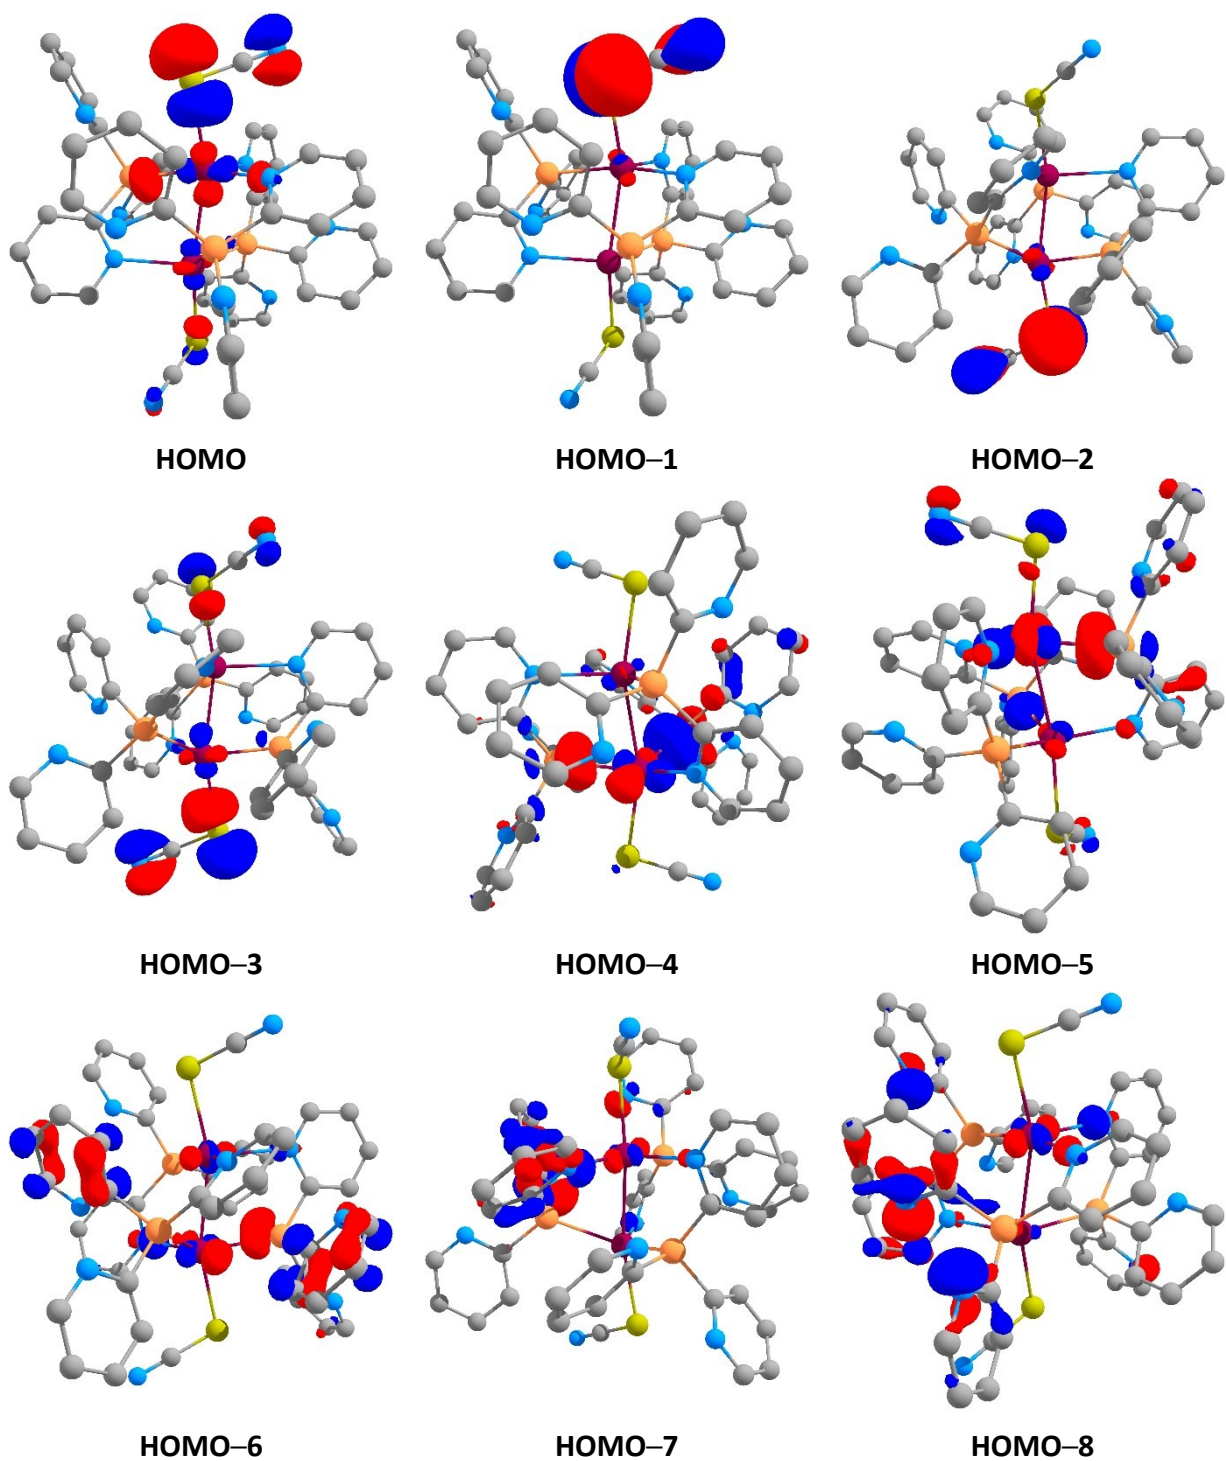

**Table S4.** Optimized geometries of **1** calculated at M062X/def2-SVP level of the theory.

| Ground state ( $S_0$ ) |              |              |              | Lowest triplet state ( $T_1$ ) |              |              |              |
|------------------------|--------------|--------------|--------------|--------------------------------|--------------|--------------|--------------|
| Ag                     | -1.125957000 | 0.466809000  | 1.272622000  | Ag                             | 0.934522000  | -0.096574000 | 1.139606000  |
| Ag                     | 0.887053000  | -0.485936000 | -1.148035000 | Ag                             | -0.893832000 | 0.252474000  | -1.100285000 |
| P                      | 0.457008000  | -2.407519000 | 0.485566000  | P                              | -0.863582000 | 2.349368000  | 0.342549000  |
| P                      | -2.261797000 | 0.737641000  | -0.966675000 | P                              | 2.432525000  | -0.471012000 | -0.827485000 |
| P                      | 1.987133000  | 1.512860000  | 0.098341000  | P                              | -1.687336000 | -1.851179000 | 0.082504000  |
| S                      | -3.238504000 | 0.762758000  | 2.790540000  | S                              | 3.073628000  | 0.130064000  | 2.667550000  |
| S                      | 2.720062000  | -0.291028000 | -3.049441000 | S                              | -2.791783000 | -0.134001000 | -2.863339000 |
| C                      | 2.732279000  | -1.859267000 | -3.625511000 | C                              | -2.893812000 | 1.370249000  | -3.585105000 |
| N                      | 2.718722000  | -2.965181000 | -4.023274000 | N                              | -2.957680000 | 2.425216000  | -4.096672000 |
| N                      | -1.774212000 | 1.488131000  | 5.122375000  | N                              | 2.106657000  | -1.157546000 | 5.005911000  |

|   |              |              |              |   |              |              |              |
|---|--------------|--------------|--------------|---|--------------|--------------|--------------|
| C | -2.392917000 | 1.180592000  | 4.171408000  | C | 2.500895000  | -0.606750000 | 4.045995000  |
| N | 0.422247000  | -0.792136000 | 2.600988000  | N | -0.500500000 | 0.831693000  | 2.513481000  |
| N | -0.976415000 | -0.892626000 | -2.637749000 | N | 0.884301000  | 0.714615000  | -2.664574000 |
| N | 0.167337000  | 2.544041000  | 1.826936000  | N | 0.292203000  | -2.540964000 | 1.792609000  |
| C | 1.227835000  | -4.034327000 | 0.093603000  | C | -1.977669000 | 3.747651000  | -0.084032000 |
| N | 1.077664000  | -5.057508000 | 0.940013000  | N | -1.688992000 | 4.940043000  | 0.442384000  |
| C | 1.871573000  | -4.146916000 | -1.136517000 | C | -3.053129000 | 3.525895000  | -0.943275000 |
| H | 1.975075000  | -3.292563000 | -1.810733000 | H | -3.236255000 | 2.531222000  | -1.359362000 |
| C | 1.572542000  | -6.235734000 | 0.578122000  | C | -2.475736000 | 5.962957000  | 0.126329000  |
| H | 1.443200000  | -7.061936000 | 1.289873000  | H | -2.223359000 | 6.933773000  | 0.573322000  |
| C | 2.224285000  | -6.457456000 | -0.638959000 | C | -3.569135000 | 5.852440000  | -0.735437000 |
| H | 2.599344000  | -7.454353000 | -0.885702000 | H | -4.170140000 | 6.733229000  | -0.976746000 |
| C | 2.376956000  | -5.389441000 | -1.513747000 | C | -3.860044000 | 4.608272000  | -1.284191000 |
| H | 2.870607000  | -5.487633000 | -2.485364000 | H | -4.686826000 | 4.473949000  | -1.987071000 |
| C | 0.876702000  | -2.001019000 | 2.229336000  | C | -1.211493000 | 1.936267000  | 2.057498000  |
| C | 1.617476000  | -2.810805000 | 3.087706000  | C | -2.188300000 | 2.539953000  | 2.855910000  |
| H | 1.934052000  | -3.803538000 | 2.760961000  | H | -2.723815000 | 3.412353000  | 2.467718000  |
| C | 1.888042000  | -2.338203000 | 4.371256000  | C | -2.465604000 | 2.040616000  | 4.118749000  |
| H | 2.461416000  | -2.953335000 | 5.071293000  | H | -3.214336000 | 2.518202000  | 4.756174000  |
| C | 1.408388000  | -1.092553000 | 4.754028000  | C | -1.737553000 | 0.902084000  | 4.566835000  |
| H | 1.584452000  | -0.691256000 | 5.754508000  | H | -1.898993000 | 0.473962000  | 5.558984000  |
| C | 0.673281000  | -0.347154000 | 3.833479000  | C | -0.788007000 | 0.345414000  | 3.741787000  |
| H | 0.255864000  | 0.628074000  | 4.109931000  | H | -0.201384000 | -0.520775000 | 4.073516000  |
| C | -1.327850000 | -2.878432000 | 0.573641000  | C | 0.793056000  | 3.172274000  | 0.333163000  |
| N | -1.787972000 | -3.319567000 | -0.598597000 | N | 1.277740000  | 3.414702000  | -0.886543000 |
| C | -2.132181000 | -2.731082000 | 1.704956000  | C | 1.485388000  | 3.471900000  | 1.508035000  |
| H | -1.730187000 | -2.353523000 | 2.648748000  | H | 1.043851000  | 3.243399000  | 2.482629000  |
| C | -3.480939000 | -3.058432000 | 1.593433000  | C | 2.741435000  | 4.060611000  | 1.394347000  |
| H | -4.144469000 | -2.925121000 | 2.453009000  | H | 3.319662000  | 4.301941000  | 2.291531000  |
| C | -3.961743000 | -3.536157000 | 0.380513000  | C | 3.240693000  | 4.340945000  | 0.126988000  |
| H | -5.012947000 | -3.807588000 | 0.251973000  | H | 4.217555000  | 4.813880000  | -0.008180000 |
| C | -3.070895000 | -3.651191000 | -0.686240000 | C | 2.467531000  | 3.997368000  | -0.981900000 |
| H | -3.416373000 | -4.021735000 | -1.660635000 | H | 2.836259000  | 4.199605000  | -1.996974000 |
| C | -4.059580000 | 0.907741000  | -0.612362000 | C | 4.192619000  | -0.171153000 | -0.412418000 |
| N | -4.585540000 | -0.228844000 | -0.149485000 | N | 4.404322000  | 1.103761000  | -0.070506000 |
| C | -4.782150000 | 2.098533000  | -0.697166000 | C | 5.184137000  | -1.151799000 | -0.353196000 |
| H | -4.324198000 | 3.008717000  | -1.094224000 | H | 4.976650000  | -2.183361000 | -0.651405000 |
| C | -6.102717000 | 2.097099000  | -0.253058000 | C | 6.446782000  | -0.776297000 | 0.098044000  |
| H | -6.698473000 | 3.013510000  | -0.293070000 | H | 7.250570000  | -1.515098000 | 0.163479000  |
| C | -6.647654000 | 0.919661000  | 0.244822000  | C | 6.669419000  | 0.547875000  | 0.464756000  |
| H | -7.674448000 | 0.881389000  | 0.616276000  | H | 7.642869000  | 0.878040000  | 0.834944000  |
| C | -5.845437000 | -0.222146000 | 0.263835000  | C | 5.612232000  | 1.452088000  | 0.351828000  |
| H | -6.243293000 | -1.172619000 | 0.644111000  | H | 5.748791000  | 2.505888000  | 0.628560000  |
| C | -1.776257000 | 2.355544000  | -1.713735000 | C | 2.324968000  | -2.218165000 | -1.404017000 |
| N | -1.531872000 | 2.418967000  | -3.021313000 | N | 2.049218000  | -2.440026000 | -2.687001000 |
| C | -1.604121000 | 3.448133000  | -0.852620000 | C | 2.457295000  | -3.244467000 | -0.461023000 |
| H | -1.805914000 | 3.339740000  | 0.219441000  | H | 2.679029000  | -3.006918000 | 0.585238000  |
| C | -1.107172000 | 3.574949000  | -3.526599000 | C | 1.892183000  | -3.699203000 | -3.087475000 |
| H | -0.912246000 | 3.593630000  | -4.607151000 | H | 1.666181000  | -3.849852000 | -4.151328000 |
| C | -0.905644000 | 4.720322000  | -2.757203000 | C | 1.995367000  | -4.793244000 | -2.228662000 |
| H | -0.549727000 | 5.643260000  | -3.222400000 | H | 1.848787000  | -5.808140000 | -2.606717000 |
| C | -1.163444000 | 4.652240000  | -1.389624000 | C | 2.289559000  | -4.557429000 | -0.887700000 |
| H | -1.013360000 | 5.523277000  | -0.744375000 | H | 2.380564000  | -5.384918000 | -0.177734000 |
| C | -2.196865000 | -0.403647000 | -2.405686000 | C | 2.166821000  | 0.512933000  | -2.353695000 |
| C | -3.303324000 | -0.757536000 | -3.174823000 | C | 3.216228000  | 1.011903000  | -3.122241000 |
| H | -4.288520000 | -0.334192000 | -2.963695000 | H | 4.255072000  | 0.820776000  | -2.842354000 |
| C | -3.116767000 | -1.664333000 | -4.214705000 | C | 2.903340000  | 1.762856000  | -4.251742000 |
| H | -3.962683000 | -1.967504000 | -4.838768000 | H | 3.700424000  | 2.172946000  | -4.878591000 |
| C | -1.845519000 | -2.175381000 | -4.450157000 | C | 1.567158000  | 1.986822000  | -4.564986000 |
| H | -1.658330000 | -2.894264000 | -5.250746000 | H | 1.275581000  | 2.581500000  | -5.433306000 |
| C | -0.794664000 | -1.755055000 | -3.637473000 | C | 0.585168000  | 1.439098000  | -3.743061000 |
| H | 0.223274000  | -2.137231000 | -3.791374000 | H | -0.477812000 | 1.609178000  | -3.953555000 |
| C | 2.908199000  | 2.564573000  | -1.113135000 | C | -2.521118000 | -2.958601000 | -1.133676000 |
| N | 4.141362000  | 2.977418000  | -0.816219000 | N | -3.809908000 | -3.246655000 | -0.968983000 |
| C | 2.270114000  | 2.879777000  | -2.315920000 | C | -1.771929000 | -3.389332000 | -2.234188000 |
| H | 1.264447000  | 2.499009000  | -2.526422000 | H | -0.722396000 | -3.089374000 | -2.337875000 |

|   |              |              |              |   |              |              |              |
|---|--------------|--------------|--------------|---|--------------|--------------|--------------|
| C | 4.793308000  | 3.706464000  | -1.715852000 | C | -4.411483000 | -3.972229000 | -1.907506000 |
| H | 5.809817000  | 4.023084000  | -1.448260000 | H | -5.477863000 | -4.183477000 | -1.755641000 |
| C | 4.247270000  | 4.071817000  | -2.947000000 | C | -3.755486000 | -4.458938000 | -3.037772000 |
| H | 4.830782000  | 4.666769000  | -3.654141000 | H | -4.299753000 | -5.047384000 | -3.780654000 |
| C | 2.955840000  | 3.653607000  | -3.247139000 | C | -2.403465000 | -4.165517000 | -3.197870000 |
| H | 2.489064000  | 3.909763000  | -4.203018000 | H | -1.852891000 | -4.519150000 | -4.074765000 |
| C | 3.335646000  | 0.706953000  | 1.067894000  | C | -3.017029000 | -1.288775000 | 1.222611000  |
| C | 4.230156000  | -0.152115000 | 0.415630000  | C | -3.917661000 | -0.305166000 | 0.791232000  |
| H | 4.180296000  | -0.289236000 | -0.672066000 | H | -3.904069000 | 0.049119000  | -0.245856000 |
| N | 3.332771000  | 0.894240000  | 2.384635000  | N | -3.004098000 | -1.786118000 | 2.453689000  |
| C | 5.166755000  | -0.825618000 | 1.190254000  | C | -4.836818000 | 0.176961000  | 1.716135000  |
| H | 5.884431000  | -1.502991000 | 0.718415000  | H | -5.556485000 | 0.947971000  | 1.424876000  |
| C | 5.173836000  | -0.627831000 | 2.569777000  | C | -4.818321000 | -0.324697000 | 3.013923000  |
| H | 5.893666000  | -1.139915000 | 3.213615000  | H | -5.513691000 | 0.041282000  | 3.773651000  |
| C | 4.233783000  | 0.241859000  | 3.115827000  | C | -3.883711000 | -1.311604000 | 3.331252000  |
| H | 4.204776000  | 0.417927000  | 4.199614000  | H | -3.842574000 | -1.731501000 | 4.344467000  |
| C | 1.378339000  | 2.770520000  | 1.310540000  | C | -0.770771000 | -3.035383000 | 1.155168000  |
| C | 2.144980000  | 3.884936000  | 1.656974000  | C | -1.215129000 | -4.347573000 | 1.333263000  |
| H | 3.143162000  | 4.012741000  | 1.227422000  | H | -2.108939000 | -4.702774000 | 0.812714000  |
| C | 1.616990000  | 4.793508000  | 2.567824000  | C | -0.519126000 | -5.165833000 | 2.216059000  |
| H | 2.192537000  | 5.675156000  | 2.865102000  | H | -0.844352000 | -6.196129000 | 2.387834000  |
| C | 0.354913000  | 4.556732000  | 3.104206000  | C | 0.578805000  | -4.645348000 | 2.894564000  |
| H | -0.094368000 | 5.237589000  | 3.830727000  | H | 1.142060000  | -5.244548000 | 3.613751000  |
| C | -0.333329000 | 3.412722000  | 2.709939000  | C | 0.945003000  | -3.322815000 | 2.654421000  |
| H | -1.320889000 | 3.176236000  | 3.124651000  | H | 1.791827000  | -2.872513000 | 3.186842000  |
